# Supplementary material
Source: Springer Nature journal article supplement (https://www.springermedizin.de/resource/supplementary/13063_2012_1015_MOESM3_ESM.pdf/9619694)
Supplement: MOESM3 [file 9619694]

Sites approached and recruited.  
People with dementia screened & consent obtained.

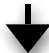

Baseline Assessment (0/31 (38) weeks) & socio-demographic information

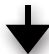

Commence CST groups

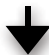

1<sup>st</sup> follow up assessment ((7/31) or (14/38) weeks) after once or twice weekly run CST sessions

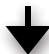

Maintenance CST commences

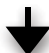

Maintenance CST finishes

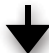

2<sup>nd</sup> follow up assessment 31 weeks following on from CST programme
